# Supplementary material for: Lithium-coordinating ionic conductor for solid-state dye-sensitized solar cells
Source: Royal Society of Chemistry journal article supplement (doi:10.1039/c5ra09688j), 2015-01-01
Supplement: c5ra09688j1.pdf [file c5ra09688j1.pdf]

## Supporting Information

### Lithium-coordinating ionic conductor for solid-state dye-sensitized solar cells

Juan Li and Zhong-Sheng Wang\*

Department of Chemistry, iChEM (Collaborative

Innovation Center of Chemistry for Energy Materials), Lab of Advanced Materials, Fudan

University, 2205 Songhu Road, Shanghai 200438, P. R. China

\*E-mail: zs.wang@fudan.edu.cn

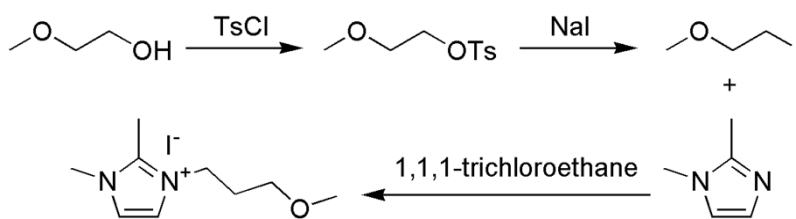

**Scheme S1.** Synthetic Route of DOII

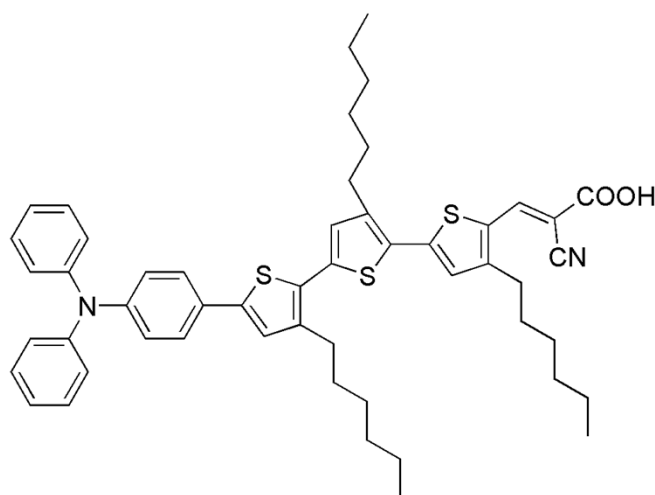

**Figure S1.** Chemical structure of the metal-free organic dye (FNE29) used in this work.

**Table S1.** Crystallographic data of DOII

|                                            |                                                  |
|--------------------------------------------|--------------------------------------------------|
| Formula                                    | C <sub>8</sub> H <sub>15</sub> IN <sub>2</sub> O |
| <i>M</i>                                   | 282.12                                           |
| <i>T</i>                                   | 293(2) K                                         |
| Cryst syst                                 | Monoclinic                                       |
| Space group                                | P2(1)/n                                          |
| a (Å)                                      | 8.701(3)                                         |
| b (Å)                                      | 10.496(4)                                        |
| c (Å)                                      | 12.077(5)                                        |
| Alpha (deg)                                | 90                                               |
| Beta (deg)                                 | 91.900(5)                                        |
| Gamma (deg)                                | 90                                               |
| V (Å <sup>3</sup> )                        | 1102.4(7)                                        |
| Z                                          | 4                                                |
| Density (mg m <sup>-3</sup> )              | 1.700                                            |
| Absorption coefficient (mm <sup>-1</sup> ) | 2.868                                            |
| Theta range (deg)                          | 2.57 to 26.01                                    |
| Reflections collected                      | 4769                                             |
| Independent reflns                         | 2160 [R(int) = 0.0368]                           |
| GOF on <i>F</i> <sup>2</sup>               | 1.018                                            |
| Final R1, wR2 [ <i>I</i> >2σ( <i>I</i> )]  | 0.0344, 0.0831                                   |

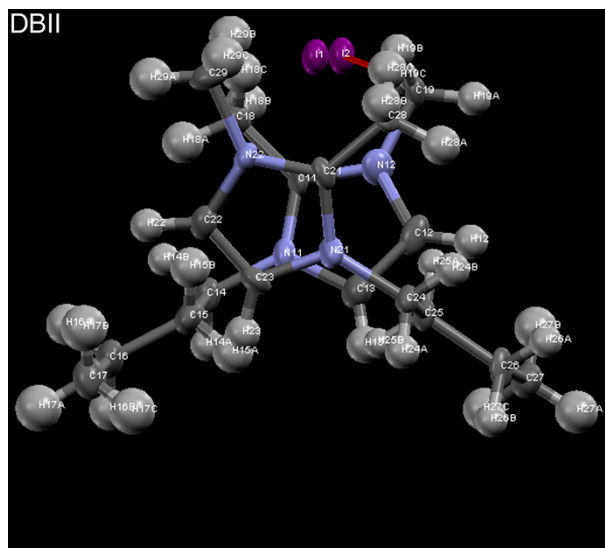

Figure S2. Single crystal structure of DBII

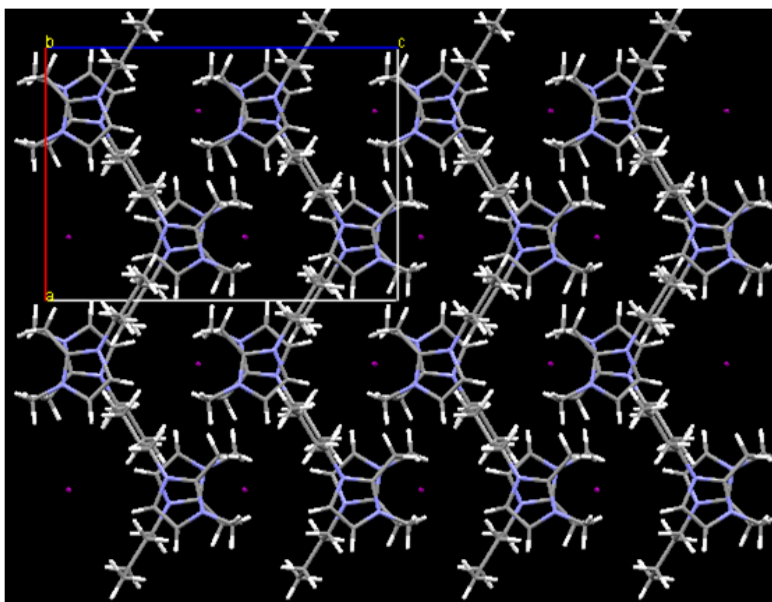

Figure S3. Packing structure of DBII viewed along the *b* axis.

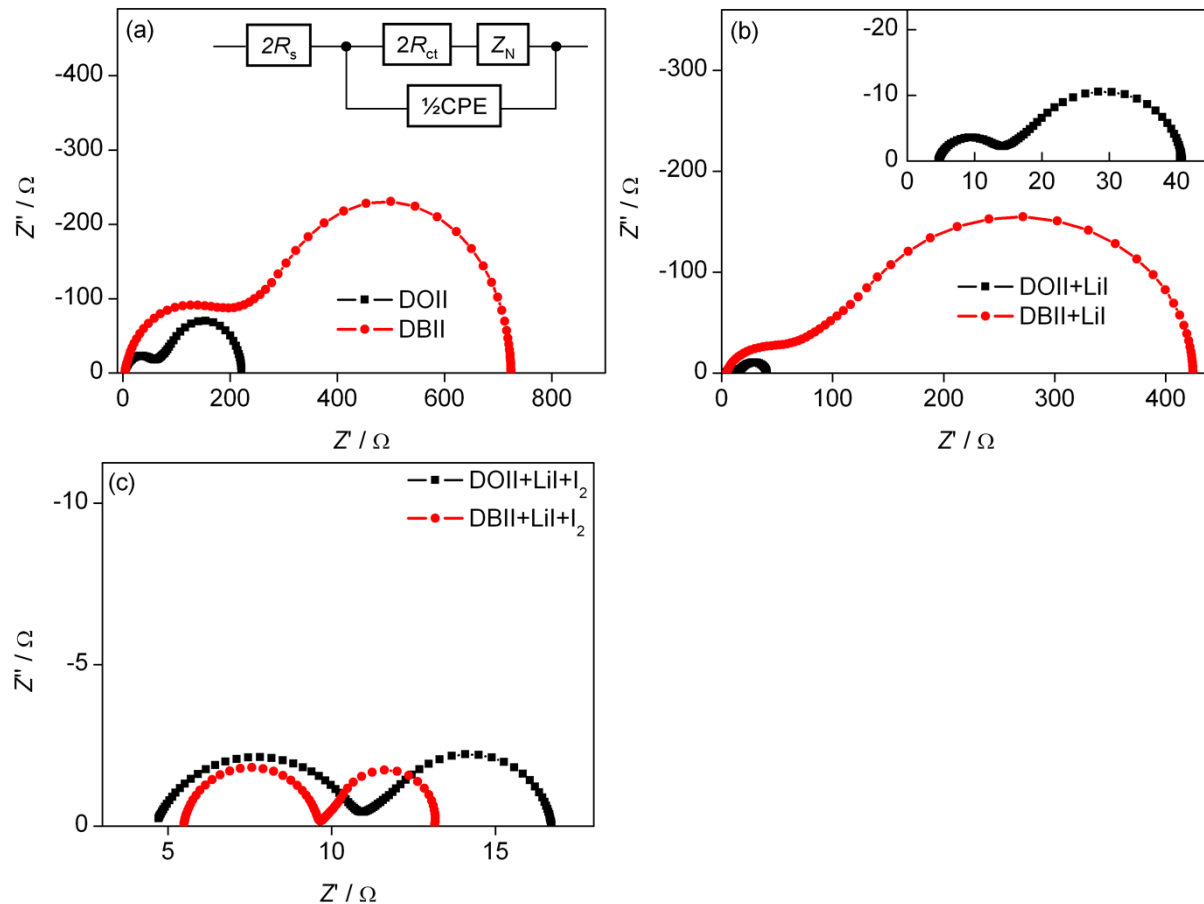

**Figure S4.** EIS plots for pure ionic conductors (a), mixtures doped with LiI (b), and mixtures doped with LiI and  $I_2$  (c). Inset in (a) is the equivalent circuit diagram for fitting the impedance spectra. The inset in (b) is the magnified impedance spectrum of DOII + LiI. The molar ratio of DOII or DBII and LiI is 2/1; the molar ratio of DOII or DBII, LiI and  $I_2$  is 2/1/0.2.
